# Supplementary material for: The plastid and mitochondrial genomes of Eucalyptus grandis
Source: PubMed Central journal article supplement (PMC6373115; doi:10.1186/s12864-019-5444-4), 2019-02-13

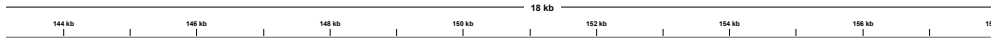

Repeat units

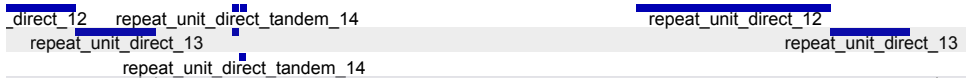

Coverage histogram

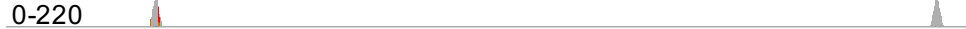

Reads aligned discordantly to mitochondrial genome

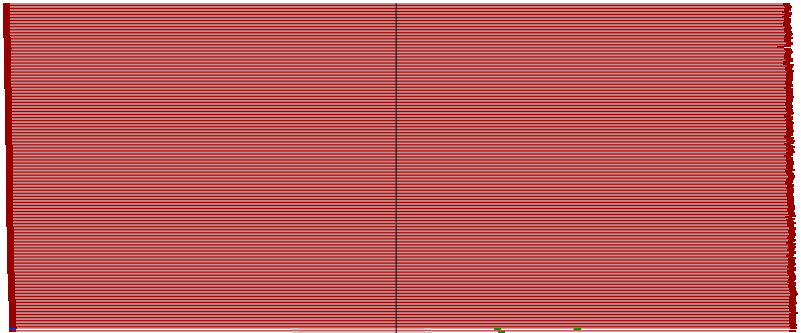

Supplement: 12864_2019_5444_MOESM4_ESM.pdf [file 12864_2019_5444_MOESM4_ESM.pdf]
