# Supplementary material for: The plastid and mitochondrial genomes of Eucalyptus grandis
Source: PubMed Central journal article supplement (PMC6373115; doi:10.1186/s12864-019-5444-4), 2019-02-13
Supplement: 12864_2019_5444_MOESM6_ESM.pdf [file 12864_2019_5444_MOESM6_ESM.pdf]

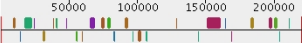

*Brassica rapa subsp. oleifera*

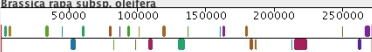

*Medicago truncatula*

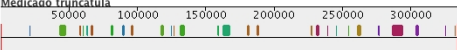

*Lagerstroemia indica*

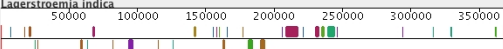

*Arabidopsis thaliana*

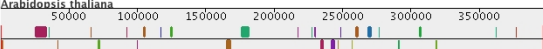

*Malus domestica*

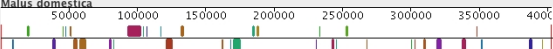

*Glycine max*

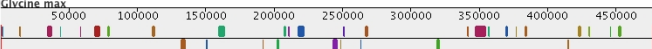

*Carica papaya*

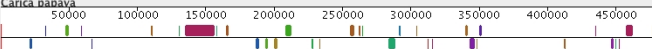

*Eucalyptus grandis*

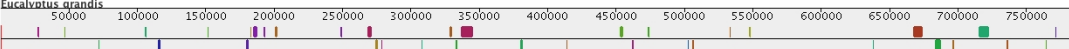

*Populus tremula*
