# Supplementary material for: The plastid and mitochondrial genomes of Eucalyptus grandis
Source: BMC Genomics. 2019 Feb 13;20:132. doi: 10.1186/s12864-019-5444-4 (PMC6373115; doi:10.1186/s12864-019-5444-4)
Supplement: Supplementary file 2 — Excel spreadsheet of the results of UniPro UGENE analysis of large (length > 100 bp, identity > 95%) repeats in the Eucalyptus grandis mitochondrial genome. (XLSX 10 kb) [file 12864_2019_5444_MOESM2_ESM.xlsx]

## Sheet: E. grandis mito - large repeats
Chromosome	Repeat ID	Repeat length (bp)	Repeat type	Start position of repeat 1	Stop position of repeat 1	Start position of repeat 2	Stop position of repeat 2	Distance between repeat units	% Identity between repeat units
TAG0014_chr_M	direct_repeat_1	1148	direct	2642	3789	123796	124943	120006	0.99
TAG0014_chr_M	direct_repeat_2	366	direct	3784	4149	124937	125302	120787	1
TAG0014_chr_M	direct_repeat_3	4210	direct	4150	8359	125302	129511	116942	0.99
TAG0014_chr_M	direct_repeat_4	206	direct	8356	8561	129507	129712	120945	1
TAG0014_chr_M	direct_repeat_5	111	direct	18886	18996	62185	62295	43188	0.96
TAG0014_chr_M	direct_repeat_6	148	direct	19276	19423	62575	62722	43151	0.95
TAG0014_chr_M	direct_repeat_7	168	direct	30244	30411	61419	61586	31007	0.98
TAG0014_chr_M	direct_repeat_8	112	direct	69296	69407	342511	342622	273103	1
TAG0014_chr_M	direct_repeat_9	156	direct	112639	112794	289598	289753	176803	0.96
TAG0014_chr_M	direct_repeat_10	100	direct	122685	122784	478627	478726	355842	0.98
TAG0014_chr_M	direct_repeat_11	117	direct	133639	133755	410755	410871	276999	0.97
TAG0014_chr_M	direct_repeat_12	2920	direct	141270	144189	152609	155528	8419	0.99
TAG0014_chr_M	direct_repeat_13	1207	direct	144175	145381	155513	156719	10131	0.99
TAG0014_chr_M	direct_repeat_14	102	direct_tandem	146537	146638	146639	146740	0	1
TAG0014_chr_M	direct_repeat_15	102	direct_tandem	146543	146644	146645	146746	0	1
TAG0014_chr_M	direct_repeat_16	100	direct	159337	159436	159464	159563	27	0.97
TAG0014_chr_M	direct_repeat_17	216	direct	224335	224550	290658	290873	66107	0.99
TAG0014_chr_M	direct_repeat_18	108	direct	445264	445371	445434	445541	62	0.96
TAG0014_chr_M	direct_repeat_19	101	direct_tandem	477589	477689	477690	477790	0	1
TAG0014_chr_M	inverted_repeat_1	277	inverted	18587	18863	224323	224599	205459	0.98
TAG0014_chr_M	inverted_repeat_2	1352	inverted	18638	19989	289520	290871	269530	0.99
TAG0014_chr_M	inverted_repeat_3	161	inverted	19764	19924	112626	112786	92701	0.97
TAG0014_chr_M	inverted_repeat_4	325	inverted	30727	31051	199487	199811	168435	0.98
TAG0014_chr_M	inverted_repeat_5	326	inverted	30735	31060	199478	199803	168417	0.98
TAG0014_chr_M	inverted_repeat_6	111	inverted	62185	62295	290513	290623	228217	0.96
TAG0014_chr_M	inverted_repeat_7	136	inverted	62567	62702	290106	290241	227403	0.97
TAG0014_chr_M	inverted_repeat_8	148	inverted	62575	62722	290086	290233	227363	0.95
TAG0014_chr_M	inverted_repeat_9	115	inverted	165170	165284	333614	333728	168329	0.96
TAG0014_chr_M	inverted_repeat_10	112	inverted	224978	225089	426524	426635	201434	0.96
TAG0014_chr_M	inverted_repeat_11	107	inverted	266958	267064	307377	307483	40312	0.96
